# Supplementary material for: Molecular Typing of Staphylococcus aureus Isolated from Patients with Autosomal Dominant Hyper IgE Syndrome
Source: PubMed Central journal article supplement (PMC5488657; doi:10.3390/pathogens6020023), 2017-06-06
Supplement: pathogens-06-00023-s001.pdf [file pathogens-06-00023-s001.pdf]

**Table S1. Demographics and clinical characteristics of patients with physician-diagnosed atopic dermatitis**

| Patient ID | Gender | Age <sup>+</sup> | Race | SCORAD at time of culture | AD severity | History of skin abscesses | On prophylactic antibiotics |
|------------|--------|------------------|------|---------------------------|-------------|---------------------------|-----------------------------|
| AD-1       | M      | 11               | B    | 18                        | mild        | N                         | N                           |
| AD-2       | M      | 46               | W    | 9                         | mild        | N                         | N                           |
| AD-3       | M      | 21               | A    | 16                        | mild        | N                         | N                           |
| AD-4       | F      | 19               | W    | 16                        | mild        | N                         | N                           |
| AD-5       | F      | 12               | B    | 8                         | mild        | N                         | N                           |
| AD-6       | M      | 6                | W    | 14                        | mild        | N                         | N                           |
| AD-7       | F      | 16               | W    | 2                         | mild        | N                         | N                           |
| AD-13      | M      | 14               | W    | ND                        | mild        | N                         | N                           |
| AD-22      | M      | 51               | W    | 13                        | mild        | N                         | N                           |
| AD-29      | M      | 5                | A    | 45                        | moderate    | N                         | N                           |
| AD-30      | M      | 3                | A    | 56                        | severe      | N                         | N                           |
| AD-35      | M      | 16               | A    | 33                        | moderate    | N                         | N                           |
| AD-37      | M      | 19               | W    | 56                        | severe      | N                         | N                           |

<sup>+</sup>Age in years; M, male; F, female; A, Asian; B, Black; W, White; SCORAD, Scoring Atopic Dermatitis index scale; AD, atopic dermatitis; ND, not determined; N, no

**Table S2. Coagulase-positive *S. aureus* strains isolated from patients with atopic dermatitis**

| <b><i>S. aureus</i> isolates from patients with atopic dermatitis</b> |                |                 |             |            |                |
|-----------------------------------------------------------------------|----------------|-----------------|-------------|------------|----------------|
| <b>ID</b>                                                             | <b>MLST ST</b> | <b>Spa type</b> | <b>MRSA</b> | <b>PVL</b> | <b>SEK/SEQ</b> |
| AD-1                                                                  | 59             | t12548          | N           | N          | Y              |
| AD-2                                                                  | 8              | t1476           | N           | N          | N              |
| AD-3                                                                  | N.D.           | t267            | N           | Y          | N              |
| AD-4                                                                  | 72             | t148            | N           | N          | N              |
| AD-7                                                                  | 1191           | t2260           | N           | N          | N              |
| AD-13                                                                 | 72             | t148            | N           | N          | N              |
| AD-29                                                                 | 8              | t118            | N           | N          | N              |
| AD-30                                                                 | 8              | t118            | N           | Y          | N              |
| AD-37                                                                 | N.D.           | t922            | N           | N          | N              |

N.D., not determinable; ST, sequence type; N, no; Y, yes

**Table S3. Single locus typing results for all *S. aureus* isolates**

| <b><i>S. aureus</i> isolates from patients with atopic dermatitis</b> |                    |                    |                    |                   |                   |                   |                    |           |
|-----------------------------------------------------------------------|--------------------|--------------------|--------------------|-------------------|-------------------|-------------------|--------------------|-----------|
| <b>ID</b>                                                             | <b><i>arcC</i></b> | <b><i>aroE</i></b> | <b><i>glpF</i></b> | <b><i>gmk</i></b> | <b><i>pta</i></b> | <b><i>tpi</i></b> | <b><i>yqiL</i></b> | <b>ST</b> |
| AD-1                                                                  | 19                 | 23                 | 15                 | 2                 | 19                | 20                | 15                 | 59        |
| AD-2                                                                  | 3                  | 3                  | 1                  | 1                 | 4                 | 4                 | 3                  | 8         |
| AD-3                                                                  | 3                  | (1)*               | 1                  | 1                 | 1                 | 5                 | 3                  | N.D.      |
| AD-4                                                                  | 1                  | 4                  | 1                  | 8                 | 4                 | 4                 | 3                  | 72        |
| AD-7                                                                  | 3                  | 3                  | 1                  | 1                 | 4                 | 5                 | 3                  | 1991      |
| AD-13                                                                 | 1                  | 4                  | 1                  | 8                 | 4                 | 4                 | 3                  | 72        |
| AD-29                                                                 | 3                  | 3                  | 1                  | 1                 | 4                 | 4                 | 3                  | 8         |
| AD-30                                                                 | 3                  | 3                  | 1                  | 1                 | 4                 | 4                 | 3                  | 8         |
| AD-37                                                                 | 1                  | 1                  | 1                  | 119               | 1                 | 1                 | 1                  | N.D.      |
| <b><i>S. aureus</i> isolates from patients with AD-HIES</b>           |                    |                    |                    |                   |                   |                   |                    |           |
| P-14                                                                  | 22                 | 1                  | 14                 | 23                | 12                | 4                 | 31                 | 88        |
| P-15                                                                  | 3                  | 1                  | 14                 | 23                | 12                | 4                 | 31                 | 2148      |
| P-16                                                                  | 22                 | 1                  | 14                 | 23                | 12                | 4                 | 31                 | 88        |
| P-17 (blue)                                                           | 3                  | 3                  | 1                  | 1                 | 4                 | 4                 | 3                  | 8         |
| P-19 (large)                                                          | 22                 | 1                  | 14                 | 23                | 12                | 4                 | 31                 | 88        |
| P-20                                                                  | 3                  | 3                  | 1                  | 1                 | 4                 | 4                 | 3                  | 8         |
| P-21                                                                  | 3                  | 3                  | 1                  | 1                 | 4                 | 4                 | 3                  | 8         |
| P-31                                                                  | 3                  | 1                  | 1                  | 8                 | 1                 | 4                 | 1                  | N.D.      |
| P-32                                                                  | 3                  | 3                  | 1                  | 1                 | 4                 | 1                 | 3                  | 8         |
| P-33                                                                  | 3                  | 3                  | 1                  | 1                 | 4                 | 4                 | 3                  | 8         |
| P-34                                                                  | 3                  | 3                  | 1                  | 1                 | 4                 | 4                 | 3                  | 8         |
| P-36                                                                  | 3                  | 3                  | 1                  | 1                 | 4                 | 4                 | 3                  | 8         |
| P-41                                                                  | 3                  | 3                  | 1                  | 1                 | 4                 | 4                 | 3                  | 8         |

\*This *aroE* gene has a 99.38% similarity to allele 1, but contained the single nucleotide polymorphism T305G. ST, sequence type. N.D., not determinable
